# Supplementary figures and images for: Strengths of non-covalent interactions in hydrogen-bonded complexes B⋯HX and halogen-bonded complexes B⋯XY (X, Y = F, Cl): an ab initio investigation
Source: Royal Society of Chemistry journal article supplement (doi:10.1039/c8nj00470f), 2018-01-01

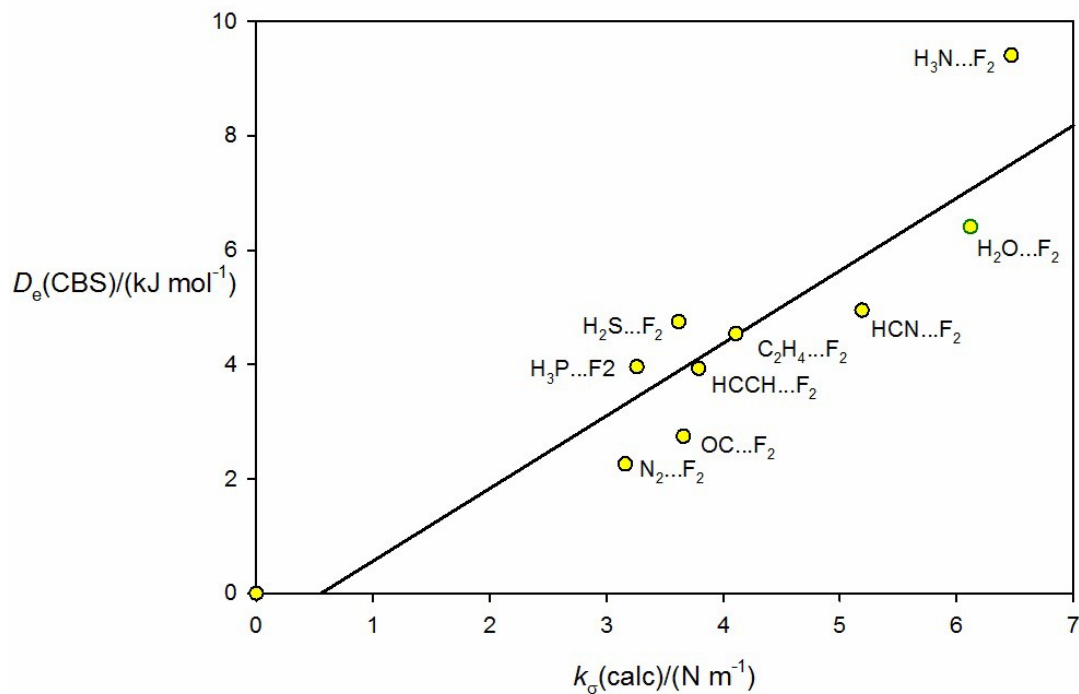

Supplement: c8nj00470f3.pdf [file c8nj00470f3.pdf]

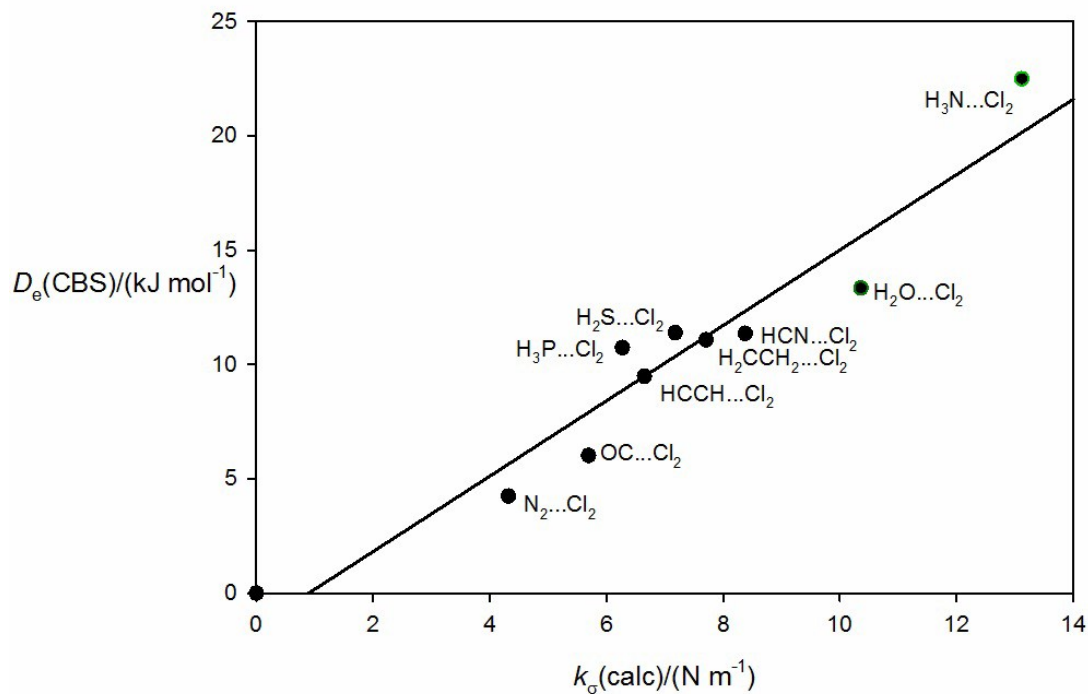

Supplement: c8nj00470f4.pdf [file c8nj00470f4.pdf]
